# Supplementary material for: Gamma radiation-induced defects in KCl, MgCl2, and ZnCl2 salts at room temperature
Source: Royal Society of Chemistry journal article supplement (doi:10.1039/d1cp00520k), 2021-01-01
Supplement: d1cp00520k1.pdf [file d1cp00520k1.pdf]

## Electronic Supplementary Information

### Supplementary Figures

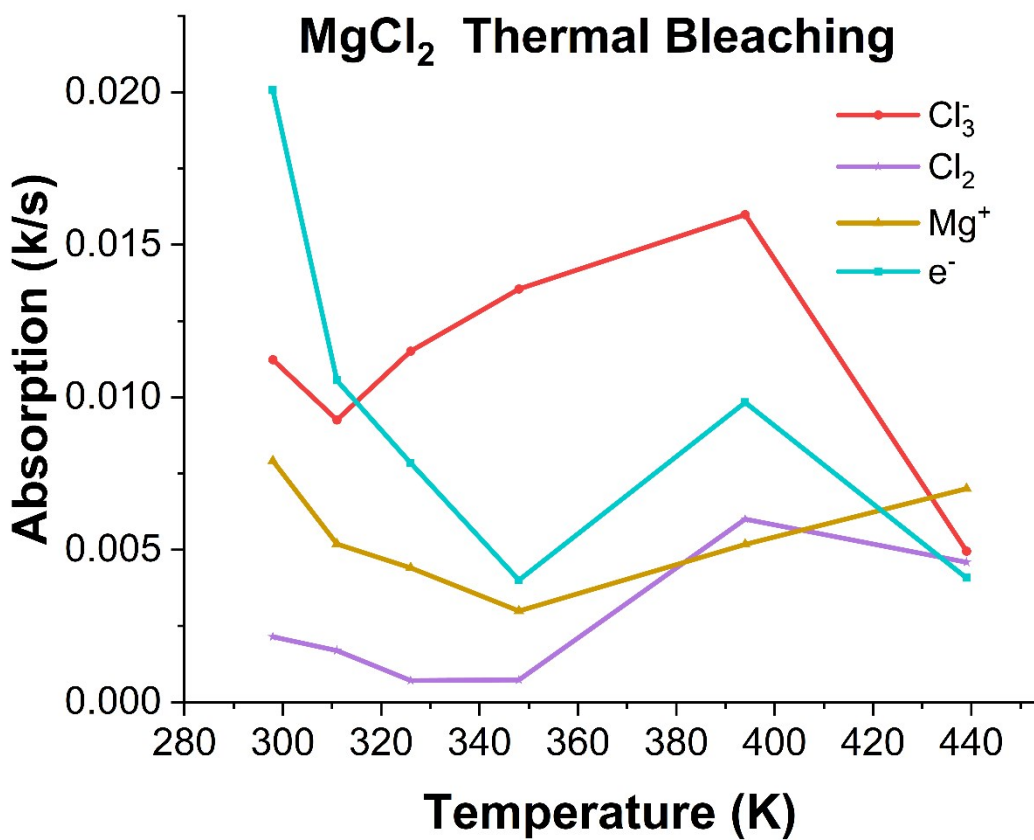

**Figure S1.** Thermal bleaching curves for the main transients in MgCl<sub>2</sub> irradiated at 100 kGy absorbed gamma dose. Cl<sub>2</sub><sup>-</sup> could not be determined by overlapping with the band at 378 nm of Mg<sup>+</sup>.
